# Supplementary material
Source: publisher site journal article supplement (https://www.spandidos-publications.com/1629/downloadSupplementary)
Supplement: Supplementary file 1 [file downloadSupplementary]

Table SI. Initial and final body weights of the mice treated with lapatinib or vehicle for 4 weeks.

| Body weight results     | Control n=22             | Lapatinib treatment    |                         |
|-------------------------|--------------------------|------------------------|-------------------------|
|                         |                          | 100 mg/kg n=22         | 200 mg/kg n=32          |
| Initial body weight (g) | 18.26±2.11               | 17.81±1.49             | 18.70±1.57              |
| Final body weight (g)   | 18.26±1.58               | 18.75±1.93             | 17.77±2.80              |
| Body weight gain (g)    | 0.00±2.44 <sup>a,b</sup> | 0.94±1.85 <sup>a</sup> | -0.93±2.80 <sup>b</sup> |

Data are presented as mean ± standard deviation (SD). <sup>a,b</sup>P<0.05, indicates statistical significance.

Table SII. Follicle counting of mice treated with lapatinib or vehicle for 4 weeks.

| Follicles per section | Control n=10 | Lapatinib treatment |                | P-value |
|-----------------------|--------------|---------------------|----------------|---------|
|                       |              | 100 mg/kg n=10      | 200 mg/kg n=10 |         |
| Primordial            | 10.80±3.76   | 10.14±3.27          | 11.76±4.01     | 0.62    |
| Primary               | 3.42±1.07    | 3.76±2.05           | 4.28±2.14      | 0.57    |
| Secondary             | 3.10±1.10    | 2.56±1.33           | 3.58±1.18      | 0.19    |
| Antra                 | 1.34±0.59    | 1.28±0.40           | 1.80±0.95      | 0.20    |
| Atretic               | 18.14±6.70   | 16.44±8.08          | 19.70±8.50     | 0.65    |

Data are presented as mean ± standard deviation (SD).

Table SIII. Serum AMH levels of mice treated with lapatinib or vehicle for 4 weeks.

|           | Control n=4 | Lapatinib treatment |               | P-value |
|-----------|-------------|---------------------|---------------|---------|
|           |             | 100 mg/kg n=6       | 200 mg/kg n=5 |         |
| Serum AMH | 0.93±0.18   | 0.74±0.14           | 0.73±0.18     | 0.16    |

Data are presented as mean ± standard deviation (SD). AMH, anti-Müllerian hormone.

Table SIV. Number of pregnant mice in the groups treated with lapatinib or vehicle for 4 weeks.

| Mating round | Control n=7 | Lapatinib treatment |                | P-value |
|--------------|-------------|---------------------|----------------|---------|
|              |             | 100 mg/kg n=9       | 200 mg/kg n=10 |         |
| One          | 1           | 2                   | 3              | 0.75    |
| Two          | 2           | 1                   | 2              | 0.68    |
| Three        | 3           | 3                   | 3              | 0.86    |
| Four         | 3           | 3                   | 4              | 0.92    |

Table SV. Average number of pups in groups treated with lapatinib or vehicle for 4 weeks.

| Mating round | Lapatinib treatment |           |           | P-value        |
|--------------|---------------------|-----------|-----------|----------------|
|              | Control             | 100 mg/kg | 200 mg/kg |                |
| One          | 6.0                 | 6.0±1.4   | 6.3±1.5   | -0.8 (2 group) |
| Two          | 7.5±2.1             | 4.0       | 7.0±1.4   | -0.8 (2 group) |
| Three        | 8.0±1.0             | 6.3±2.1   | 6.7±1.2   | 0.4            |
| Four         | 9.0±2.0             | 6.5±1.3   | 6.3±2.0   | 0.2            |

Data are presented as mean ± standard deviation (SD).
